# Supplementary material
Source: Royal Society of Chemistry journal article supplement (doi:10.1039/d6cp01507g)
Supplement: d6cp01507g1.pdf [file d6cp01507g1.pdf]

## Supporting Information

### Concentration-Transferable Deep Potential Molecular Dynamics: Unraveling Component-Structure-Transport in Molten LiF-BeF<sub>2</sub>-EuF<sub>2</sub>

Yuanyuan Jiang <sup>a, b</sup>, Xuejiao Li <sup>a\*</sup>, Yu Gong <sup>a</sup>

<sup>a</sup> State Key Laboratory of Thorium Energy, Shanghai Institute of Applied Physics, Chinese  
Academy of Sciences, Shanghai 201800, China

<sup>b</sup> University of Chinese Academy of Sciences, Beijing 100049, China

#### S1. RMSEs

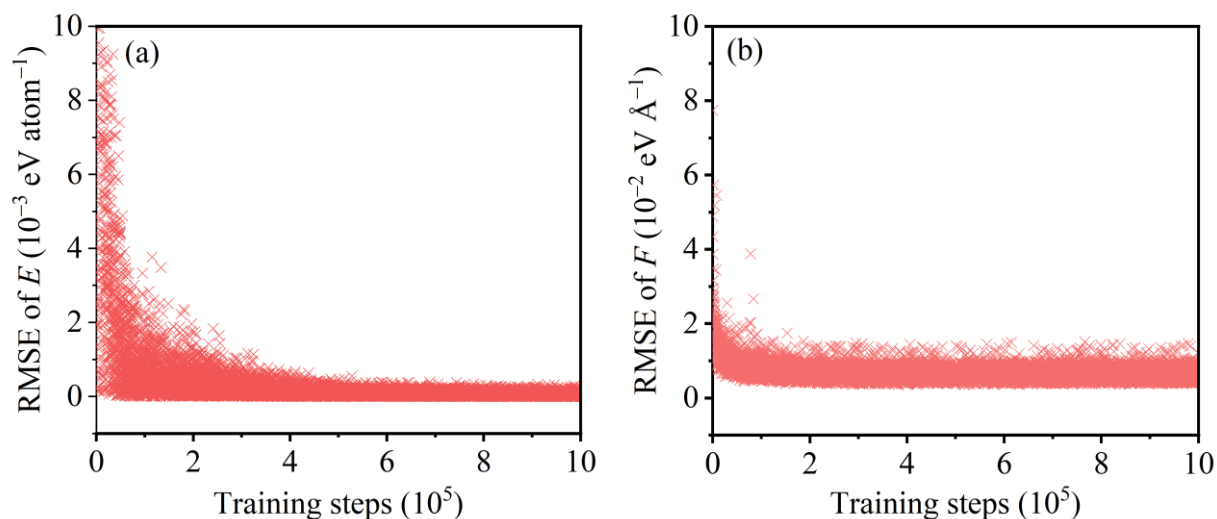

**Figure S1** RMSEs of (a) energy and (b) force for molten FLiBeEu evaluated from training datasets

---

\*Corresponding author. E-mails: [lixuejiao@sinap.ac.cn](mailto:lixuejiao@sinap.ac.cn)

## S2. MSDs

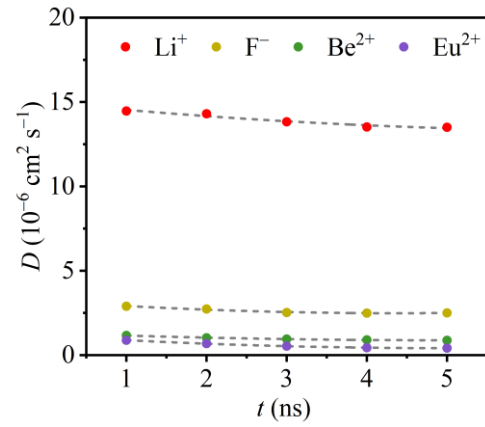

**Figure S2**  $D$  variations with extended simulation duration for the S5 system (6.25 mol%  $\text{EuF}_2$ )

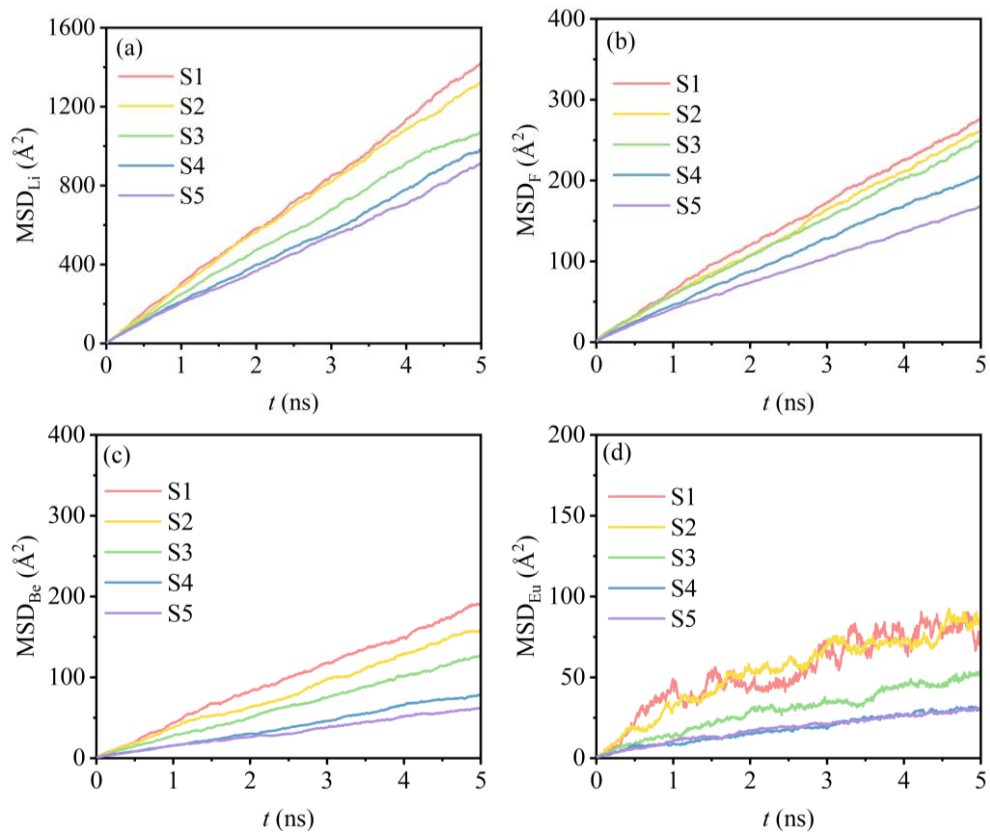

**Figure S3** MSDs of (a) Li, (b) F, (c) Be, and (d) Eu ions in molten FLiBeEu with different  $\text{EuF}_2$  concentrations at 823 K

### S3. RDFs

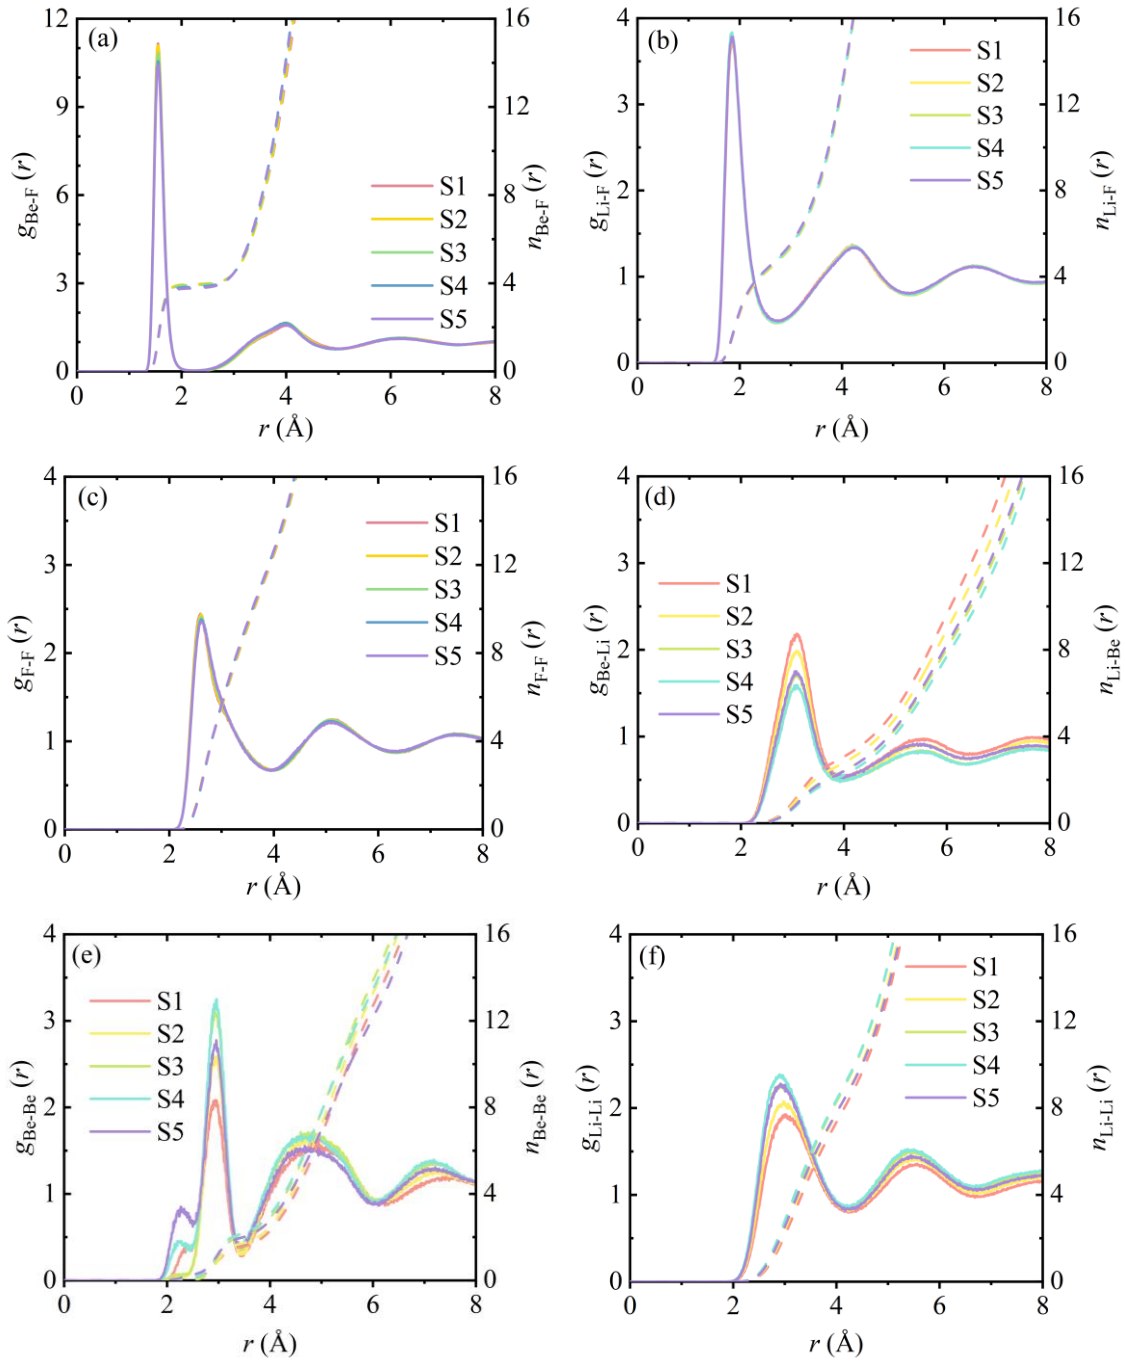

**Figure S4** RDFs of (a) Be-F, (b) Li-F, (c) F-F, (d) Be-Li, (e) Be-Be, and (f) Li-Li ionic pairs for molten FLiBeEu with different  $\text{EuF}_2$  concentrations at 823 K

**Table S1** First-peak positions ( $R$ , Å) and heights ( $H$ ) along with their relative deviations ( $\Delta R = (R_{\text{DP}} - R_{\text{FP}})/R_{\text{FP}}$  and  $\Delta H = (H_{\text{DP}} - H_{\text{FP}})/H_{\text{FP}}$ ) for the RDFs of each ionic pair from FPMD, FPMD+U, and

DPMD simulations at 6.25 mol% EuF<sub>2</sub>

| Ionic pair | $R_{\text{FP+U}}$ | $R_{\text{FP}}$ | $R_{\text{DP}}$ | $\Delta R$ | $H_{\text{FP+U}}$ | $H_{\text{FP}}$ | $H_{\text{DP}}$ | $\Delta H$ |
|------------|-------------------|-----------------|-----------------|------------|-------------------|-----------------|-----------------|------------|
| Be-F       | 1.56              | 1.56            | 1.56            | 0          | 11.78             | 8.90            | 10.25           | 15.2%      |
| Li-F       | 1.87              | 1.89            | 1.86            | -1.6%      | 3.71              | 3.08            | 3.65            | 18.5%      |
| F-F        | 2.57              | 2.62            | 2.64            | 0.8%       | 2.43              | 1.76            | 2.29            | 30.1%      |
| Be-Be      | 2.92              | 2.94            | 2.94            | 0          | 1.14              | 0.78            | 3.01            | 285.9%     |
| Be-Li      | 3.09              | 3.06            | 3.06            | 0          | 2.65              | 1.65            | 1.72            | 4.2%       |
| Li-Li      | 3.11              | 3.04            | 2.94            | -3.3%      | 1.81              | 1.91            | 2.21            | 15.7%      |
| Eu-F       | 2.50              | 2.25            | 2.29            | 1.8%       | 3.71              | 4.11            | 5.27            | 28.2%      |
| Eu-Be      | 3.35              | 2.94            | 2.80            | -4.8%      | 2.60              | 1.78            | 2.74            | 53.9%      |
| Eu-Eu      | 4.43              | 3.73            | 3.62            | -2.9%      | 3.81              | 5.85            | 5.95            | 1.7%       |
| Eu-Li      | 3.70              | 3.56            | 3.56            | 0          | 2.01              | 1.83            | 1.81            | -1.1%      |

#### S4. Density of State (DOS)

To elucidate the driving forces of bond formation involving Eu in molten FLiBe, we performed electronic structure analysis on the final configuration obtained from AIMD simulations. Our results show that, a nonzero electron population emerges in the Eu 5d orbitals after equilibration, indicating charge transfer or orbital mixing with surrounding F ligands. However, a single static configuration cannot fully capture the detailed electronic structure of a molten salt; therefore, sampling multiple configurations along the simulation trajectory would yield greater statistical significance.

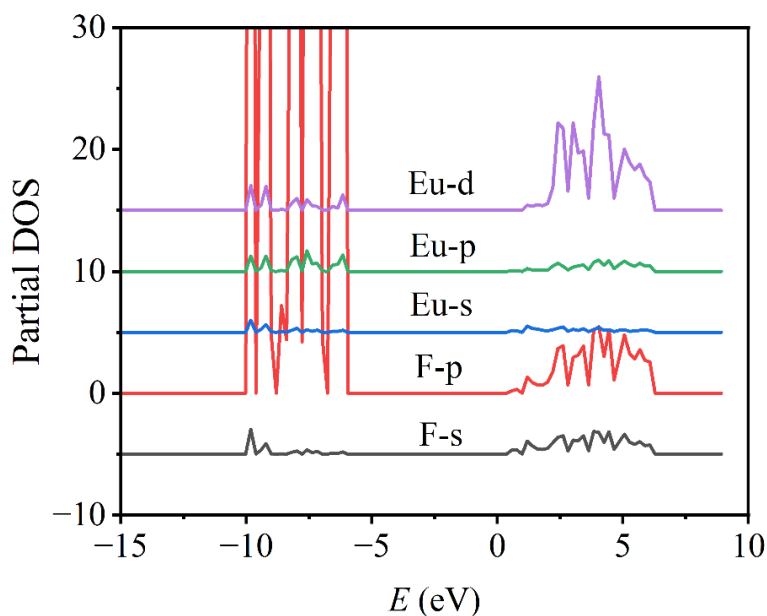

**Figure S5** Partial DOSs of Eu and F in molten FLiBeEu with an  $\text{EuF}_2$  concentrations of 6.25 mol%
